# Supplementary material
Source: PubMed Central journal article supplement (PMC1201346)
Supplement: 7600764s1.pdf [file 7600764s1.pdf]

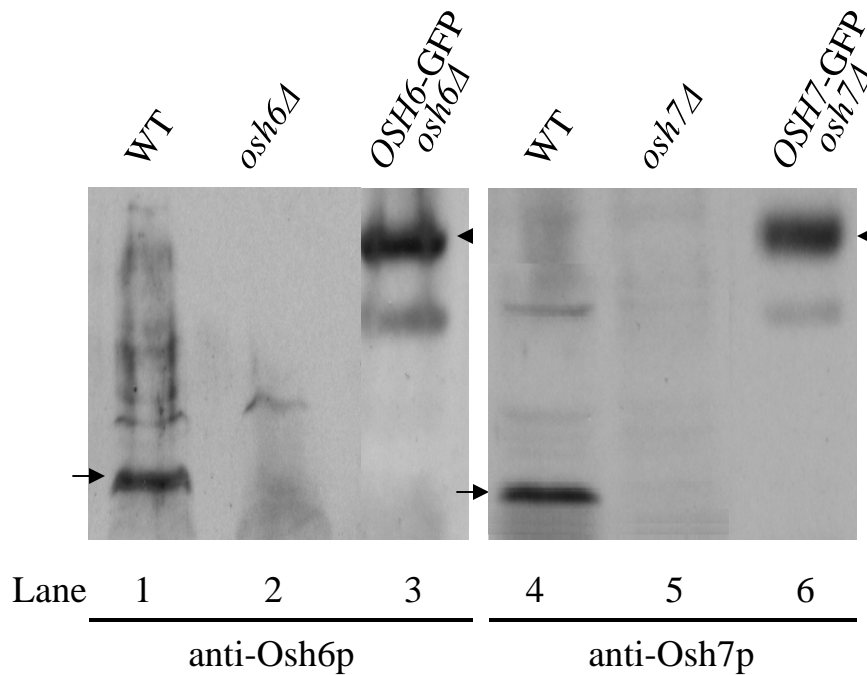

Figure S1. Osh6/7p-GFP fusion remains intact *in vivo*. Indicated stains were treated with zymolase and then osmotically lysed. Cell lysates were cleared at 500xg for 10 min and then resolved on a 10% SDS-PAGE gel. Osh6p/7p and GFP fusions were detected using anti-Osh6/7p anti-sera at a dilution of 1:500. As shown above, Osh6/7p was only observed in the wild type (WT) cell lysate (indicated with arrow in lane 1 and 4), not in the mutant cell lysate (lane 2, 3, 5 and 6). In lane 3 and 6, the GFP fusions were observed (indicated with arrow head), but no free Osh6/7p band was detected, indicating GFP fusions are intact. Lane 1 and 4: cell lysate from wild type cells. Lane 2 and 5: cell lysate from *osh6Δ* and *osh7Δ* respectively. Lane 3 and 6: lysate from *osh6/7Δ* expressing Osh6/7p-GFP from a *CEN* plasmid respectively.
