# Supplementary material
Source: PubMed Central journal article supplement (PMC1201346)
Supplement: 7600764s2.pdf [file 7600764s2.pdf]

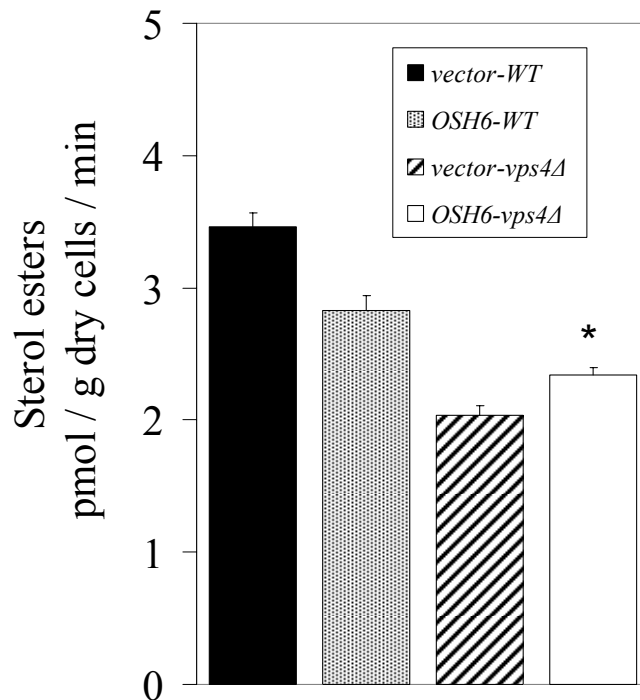

Figure S2. Overexpression of Osh6p suppresses defect in oleate incorporation in *vps4Δ* cells. Exponentially growing cells were labeled with [<sup>3</sup>H]-oleic acid at 30°C for 30 min. Cells were then washed, lyophilized, and lyzed. Sterol esters and TAG were extracted from the cell lysate with hexane, resolved by TLC, and quantified using a scintillation counter. Vector-WT: Y10000 cells carrying the vector pADNS; *OSH6*-WT: Y10000 cells overexpressing Osh6p (~20 fold higher than vector control) from the pADNS*OSH6*; Vector-*vps4Δ*: Y15588 (*vps4Δ*) cells carrying pADNS; *OSH6-vps4Δ*: Y15588 (*vps4Δ*) cells carrying pADNS*OSH6*.
